# Supplementary material
Source: PubMed Central journal article supplement (PMC2864956)
Supplement: NIHMS181944-supplement-1.pdf [file NIHMS181944-supplement-1.pdf]

**Online Table 1.** Frequency (%) of chronic histological abnormalities by age group among 1203 kidney donors

| <b>Chronic histological abnormality</b> | <b>Overall<br/>n=1203</b> | <b>18-29 y<br/>n=148</b> | <b>30-39 y<br/>n=303</b> | <b>40-49 y<br/>n=392</b> | <b>50-59 y<br/>n=257</b> | <b>60-69 y<br/>n=92</b> | <b>70-77 y<br/>n=11</b> | <b>Trend<br/>test<br/>p-value*</b> |
|-----------------------------------------|---------------------------|--------------------------|--------------------------|--------------------------|--------------------------|-------------------------|-------------------------|------------------------------------|
| Any global glomerulosclerosis           | 573 (48%)                 | 28 (19%)                 | 115 (38%)                | 185 (47%)                | 166 (65%)                | 70 (76%)                | 9 (82%)                 | <.001                              |
| >25% global glomerulosclerosis          | 19 (1.6%)                 | 1 (0.7%)                 | 2 (0.7%)                 | 4 (1.0%)                 | 7 (2.7%)                 | 4 (4.3%)                | 1 (9.1%)                | .001                               |
| Any tubular atrophy                     | 261 (22%)                 | 17 (11%)                 | 46 (15%)                 | 75 (19%)                 | 81 (32%)                 | 37 (40%)                | 5 (45%)                 | <.001                              |
| >25% tubular atrophy                    | 4 (0.3%)                  | 0 (0%)                   | 0 (0%)                   | 1 (0.3%)                 | 0 (0%)                   | 3 (3.3%)                | 0 (0.0%)                | .001                               |
| >5% interstitial fibrosis               | 59 (4.9%)                 | 2 (1.4%)                 | 6 (2.0%)                 | 8 (2.0%)                 | 24 (9.3%)                | 16 (17%)                | 3 (27%)                 | <.001                              |
| >25% interstitial fibrosis              | 5 (0.4%)                  | 0 (0%)                   | 0 (0%)                   | 1 (0.3%)                 | 0 (0%)                   | 3 (3.3%)                | 1 (9.1%)                | <.001                              |
| Any vascular luminal narrowing          | 386 (32%)                 | 15 (10%)                 | 59 (19%)                 | 143 (37%)                | 113 (44%)                | 47 (51%)                | 9 (82%)                 | <.001                              |
| >25% vascular luminal narrowing         | 40 (3.3%)                 | 0 (0%)                   | 6 (2.0%)                 | 9 (2.3%)                 | 18 (7.0%)                | 6 (6.5%)                | 1 (9.1%)                | <.001                              |
| >50% vascular luminal narrowing         | 1 (0.1%)                  | 0 (0%)                   | 0 (0%)                   | 0 (0.0%)                 | 1 (0.4%)                 | 0 (0%)                  | 0 (0%)                  | N/A                                |
| Sclerosis score†                        |                           |                          |                          |                          |                          |                         |                         | <.001                              |
| 0                                       | 403 (34%)                 | 93 (63%)                 | 139 (46%)                | 121 (31%)                | 40 (16%)                 | 9 (9.8%)                | 1 (9.1%)                |                                    |
| 1                                       | 465 (39%)                 | 51 (34%)                 | 116 (38%)                | 161 (41%)                | 105 (41%)                | 30 (33%)                | 2 (18%)                 |                                    |
| 2                                       | 221 (18%)                 | 2 (1.4%)                 | 36 (12%)                 | 81 (21%)                 | 71 (28%)                 | 28 (30%)                | 3 (27%)                 |                                    |
| 3                                       | 81 (6.7%)                 | 1 (0.6%)                 | 10 (3.3%)                | 25 (6.4%)                | 27 (11%)                 | 16 (17%)                | 2 (18%)                 |                                    |
| 4                                       | 32 (2.7%)                 | 1 (0.6%)                 | 2 (0.7%)                 | 3 (0.8%)                 | 14 (5.4%)                | 9 (9.8%)                | 3 (27%)                 |                                    |
| Nephrosclerosis‡                        | 334 (28%)                 | 4 (2.7%)                 | 48 (16%)                 | 109 (28%)                | 112 (44%)                | 53 (58%)                | 8 (73%)                 | <.001                              |

\* p-value determined from the likelihood ratio test in a nominal or ordinal logistic regression model with the chronic histological abnormality as the dependent variable and age (continuous) as the predictor.

† Sclerosis score was the sum of: any global glomerulosclerosis, any tubular atrophy, >5% interstitial fibrosis, and any vascular luminal narrowing due to arteriosclerosis

‡ Nephrosclerosis defined by a sclerosis score of 2 or higher.
